# Supplementary material for: Ubiquitin and Ubiquitin-Like Proteins and Domains in Ribosome Production and Function: Chance or Necessity?
Source: MDPI journal article supplement (doi:10.3390/ijms22094359), 2021-04-22
Supplement: s1 [file s1]

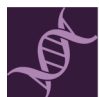

SUPPLEMENTARY MATERIAL

## Ubiquitin and ubiquitin-like proteins and domains in ribosome production and function: chance or necessity?

Sara Martín-Villanueva <sup>1,2</sup>, Gabriel Gutiérrez <sup>2</sup>, Dieter Kressler <sup>3,\*</sup> and Jesús de la Cruz <sup>1,2,\*</sup>

1 Instituto de Biomedicina de Sevilla, Hospital Universitario Virgen del Rocío/CSIC/Universidad de Sevilla, Seville, Spain. saramarvi@msn.com (S.M.V.); ggpozo@us.es (G.G.); jdlcd@us.es (J.d.l.C.)

2 Departamento de Genética, Universidad de Sevilla, Seville, Spain.

3 Unit of Biochemistry, Department of Biology, University of Fribourg, Fribourg, Switzerland.

\* Jesús de la Cruz, Instituto de Biomedicina de Sevilla, Campus Hospital Universitario "Virgen del Rocío". Avda. Manuel Siurot, s/n. E-41013, Sevilla, SPAIN. jdlcd@us.es; +34 955 923 126.

Dieter Kressler, Department of Biology, Unit of Biochemistry, University of Fribourg. Chemin du Musée 10. CH-1700 Fribourg, SWITZERLAND. dieter.kressler@unifr.ch; +41 26 300 86 45.

---

**Table S1.** List and taxonomic distribution of the 5349 proteins showing 80% identity over at least 80% of their length with the yeast ubiquitin domain. **See supplementary Table S1 excel file.**

**Table S2.** Architectures containing the ubiquitin domain. **See supplementary Table S2 excel file.**

**Table S3.** Rare variations of ubiquitin protein fusions.

**Table S4.** Proteins belonging to the Ubiquitin clan (CL0072) encoded by the *S. cerevisiae* genome as identified by PFAM. For more information and references about the function of the different proteins, readers are referred to the *Saccharomyces* Genome Database (SGD).

**Figure S1.** Number of pairwise yeast ubiquitin/PF00240 entry comparisons. The percentage shows the identity of the PF00240 architectural domain of all ubiquitin-containing proteins over at least 80% of their length with the yeast ubiquitin domain. Those proteins belonging to the PF00240 entry whose ubiquitin domain had less than 80% identity over at least 80% of its length with the yeast ubiquitin domain were discarded. In total, 5349 proteins were selected.

**Figure S2.** Schematic representation of the organization of different ubiquitin precursor proteins. Green blocks represent the ubiquitin sequence. The first amino acid and the di-glycine motif are shown. Generation of free ubiquitin from the different precursors requires the action of specific deubiquitinases (Dub) and the question mark denotes that the specific enzymes in charge of the cleavages are still unknown. (A) EhUbi1 is a single ubiquitin precursor corresponding to a monoubiquitin gene from *Entamoeba histolytica*. Note that the ubiquitin moiety is synthesized as a precursor that contains a single extra amino acid, a tyrosine, that needs to be removed for ubiquitin activation. (B) Schematic representation of the four yeast ubiquitin precursors as a paradigm of the two classes of precursors found in most eukaryotes; Ubi1, Ubi2, and Ubi3 correspond to precursors containing a single copy of ubiquitin fused to the ribosomal protein eL40 (Ubi1 and Ubi2) and eS31 (Ubi3). Note that cleavage of the Ubi1 and Ubi2 precursors results in identical ubiquitin and eL40 proteins. Ubi4 corresponds a polyubiquitin precursor protein, which consists of a polymer of five tandem ubiquitin monomers. Note that the last monomer has an extra asparagine following the di-glycine sequence motif in the immature form.

**Figure S3.** Taxonomic distribution of unfused ribosomal proteins eS31 and eL40. The PFAM database was searched for isolated eS31 and eL40 ribosomal proteins that are not fused to ubiquitin or other domains. Note that most proteins being retrieved by this criterion belong to the Archaea domain, but also reasonable representation percentages were found in plants, animals, and fungi.

**Table S3.** Rare variations of ubiquitin protein fusions

| Variation <sup>1</sup>                                                                                                                             | Abundance (%) |
|----------------------------------------------------------------------------------------------------------------------------------------------------|---------------|
| <b>Ub-eS31 variants</b>                                                                                                                            | <b>0.29</b>   |
| Ribosomal_S8e   Ubiquitin   Ribosomal_S27                                                                                                          | 0.17          |
| Ubiquitin   Ribosomal_S27   Sec10                                                                                                                  | 0.04          |
| Ubiquitin   Ubiquitin   Ribosomal_S27                                                                                                              | 0.04          |
| Fer2_2   FAD_binding_5   FAD_binding_5   CO_deh_flav_C   Ald_Xan_dh_C   Ald_Xan_dh_C2   Ald_Xan_dh_C2   Ubiquitin   Ribosomal_S27                  | 0.02          |
| Ubiquitin   Ribosomal_S27   Methyltransf_23                                                                                                        | 0.02          |
| <b>Ub-eL40 variants</b>                                                                                                                            | <b>2.21</b>   |
| zf-RRN7   Ubiquitin   Ribosomal_L40e                                                                                                               | 0.84          |
| KxDL   Ubiquitin   Ribosomal_L40e                                                                                                                  | 0.41          |
| Ubiquitin   Ribosomal_L40e   Ribosomal_L40e                                                                                                        | 0.26          |
| eIF-5A   Ubiquitin   Ribosomal_L40e                                                                                                                | 0.13          |
| Ubiquitin   Ubiquitin   Ribosomal_L40e                                                                                                             | 0.09          |
| Ubiquitin   Ribosomal_L40e   Ubiquitin   Ribosomal_L40e                                                                                            | 0.06          |
| ShK   ShK   Ubiquitin   Ribosomal_L40e                                                                                                             | 0.04          |
| V_ATPase_I   Ubiquitin   Ribosomal_L40e                                                                                                            | 0.04          |
| ATP-synt_C   ATP-synt_C   Ubiquitin   Ribosomal_L40e                                                                                               | 0.02          |
| Ubiquitin   Ribosomal_L40e | 0.02          |
| Ubiquitin   Ubiquitin   Ubiquitin   Ribosomal_L40e                                                                                                 | 0.02          |
| Ubiquitin   Ribosomal_L40e   Yip1                                                                                                                  | 0.02          |
| Ubiquitin   Ribosomal_L40e   Abhydrolase_6                                                                                                         | 0.02          |
| adh_short_C2   Ubiquitin   Ribosomal_L40e                                                                                                          | 0.02          |
| E1-E2_ATPase   Ubiquitin   Ribosomal_L40e                                                                                                          | 0.02          |
| EF-hand_5   EF-hand_5   Ubiquitin   Ribosomal_L40e   EF-hand_7                                                                                     | 0.02          |
| Vps52   Ubiquitin   Ribosomal_L40e                                                                                                                 | 0.02          |
| Ubiquitin   Ribosomal_L40e   JTB                                                                                                                   | 0.02          |
| EF-hand_5   EF-hand_5   Ubiquitin   Ribosomal_L40e                                                                                                 | 0.02          |
| GCR1_C   Ubiquitin   Ribosomal_L40e                                                                                                                | 0.02          |
| Ubiquitin   Ribosomal_L40e   EF-hand_5   EF-hand_5                                                                                                 | 0.02          |
| Ubiquitin   Ribosomal_L40e   TAXi_N   TAXi_C                                                                                                       | 0.02          |
| Cortexin   Homeodomain   TRAM_LAG1_CLN8   Ubiquitin   Ribosomal_L40e                                                                               | 0.02          |
| Cortexin   Homeodomain   Ubiquitin   Ribosomal_L40e                                                                                                | 0.02          |
| TAXi_N   TAXi_C   Ubiquitin   Ribosomal_L40e                                                                                                       | 0.02          |
| <b>Ub-Ub tandem variations &gt; 9 units</b>                                                                                                        | <b>1.77</b>   |
| Ubiquitin x 9                                                                                                                                      | 0.73          |
| Ubiquitin x 10                                                                                                                                     | 0.37          |
| Ubiquitin x 11                                                                                                                                     | 0.24          |
| Ubiquitin x 12                                                                                                                                     | 0.22          |
| Ubiquitin x 13                                                                                                                                     | 0.07          |
| Ubiquitin x 14                                                                                                                                     | 0.06          |
| Ubiquitin x 16                                                                                                                                     | 0.02          |
| Ubiquitin x 18                                                                                                                                     | 0.02          |
| Ubiquitin x 32                                                                                                                                     | 0.02          |
| Ubiquitin x 46                                                                                                                                     | 0.02          |

<sup>1</sup> These are PFAM domains. Proteins are annotated as the PFAM entries. The entries Ribosomal\_S8e, Ribosomal\_S27, and Ribosomal\_L40e correspond to ribosomal proteins eS8, eS31, and eL40, respectively. For further details, please see **Tables S1** and **S2**.

**Table S4.** Proteins belonging to the Ubiquitin clan (CL0072) encoded by the *S. cerevisiae* genome as identified by PFAM. For more information and references about the function of the different proteins, readers are referred to the *Saccharomyces* Genome Database (SGD).

| Protein                             | PFAM Description | Function                                                                              |
|-------------------------------------|------------------|---------------------------------------------------------------------------------------|
| <b>Processable Ub-like domain</b>   |                  |                                                                                       |
| Ubi1                                | Ubiquitin        | Ub-ribosomal protein eL40A fusion protein                                             |
| Ubi2                                | Ubiquitin        | Ub-ribosomal protein eL40B fusion protein                                             |
| Ubi3                                | Ubiquitin        | Ub-ribosomal protein eS31 fusion protein                                              |
| Ubi4                                | Ubiquitin        | PolyUb precursor (5 head-to-tail repeats)                                             |
| Rub1                                | Ubiquitin        | Yeast NEDD8                                                                           |
| Smt3                                | Ubiquitin        | Yeast SUMO1                                                                           |
| Hub1                                | Ubiquitin        | Promotes splicing. Unclear covalent or non-covalent conjugation                       |
| Atg8                                | Atg8             | Component of the autophagosome. Conjugated to phosphoethanolamine                     |
| Atg12                               | APG12            | Component of the autophagosome. Conjugated to Atg5                                    |
| Urm1                                | Urm1             | Promotes thiolation of selected tRNAs                                                 |
| <b>Non-cleavable Ub-like domain</b> |                  |                                                                                       |
| Rsa4                                | NLE              | 60S ribosomal subunit assembly factor. Rea1 binder                                    |
| Ytm1                                | NLE              | 60S ribosomal subunit assembly factor. Rea1 binder                                    |
| Ola1                                | YchF-GTPase_C    | P-loop ATPase. Related to translation                                                 |
| Ylf2                                | YchF-GTPase_C    | Unknown function. Similar to GTP-binding protein                                      |
| Atg5                                | APG5             | Involved in autophagy                                                                 |
| Rbg1                                | TGS              | GTP-binding protein. Related to translation                                           |
| Rbg2                                | TGS              | GTP-binding protein. Related to translation                                           |
| Ths1                                | TGS              | Threonyl-tRNA synthetase                                                              |
| Ubp15                               | USP7_ICP0_bdg    | Deubiquitinase. Ub-specific protease of specific proteins                             |
| Ubp16                               | USP7-C2          | Deubiquitinase. Anchored to the outer mitochondrial membrane                          |
| Rad23                               | Ubiquitin        | DNA damage response. Subunit of NEF2                                                  |
| Dsk2                                | Ubiquitin        | Spindle pole body duplication                                                         |
| Mdy2                                | Ubiquitin        | Required for efficient mating                                                         |
| Alf1                                | Ubiquitin_2      | Alpha-tubulin folding protein. Microtubule maintenance                                |
| Ubx2                                | Ubx              | Interacts with Cdc48. Involved in ERAD <sup>1</sup>                                   |
| Ubx3                                | Ubx              | Interacts with Cdc48. Involved in clathrin-mediated endocytosis                       |
| Ubx4                                | Ubx/ TUG-UBL1    | Interacts with Cdc48. Involved in ERAD                                                |
| Ubx5                                | Ubx              | Interacts with Cdc48.                                                                 |
| Ubx6                                | Ubx              | Interacts with Cdc48.                                                                 |
| Ubx7                                | Ubx              | Interacts with Cdc48. Paralog of Ubx6                                                 |
| Shp1                                | Ubx              | Interacts with Cdc48. Involved in ERAD                                                |
| Ste11                               | Ras_bgd_2        | Signal transducing MEK kinase. Involved in pheromone response and pseudohyphal growth |
| Ste50                               | RA               | Adaptor protein. Signal transduction                                                  |
| Mpe1                                | DWNN             | Subunit of CPF cleavage and polyadenylation factor. E3 ligase                         |
| Esc2                                | Rad60-SLD        | Diverse roles in DNA metabolism                                                       |
| Avo1                                | CRIM             | Component of TORC2                                                                    |
| Dsc3                                | DUF2407          | Unknown function. Subunit of the DSC Ub ligase                                        |

<sup>1</sup>ERAD, ER-associated protein degradation

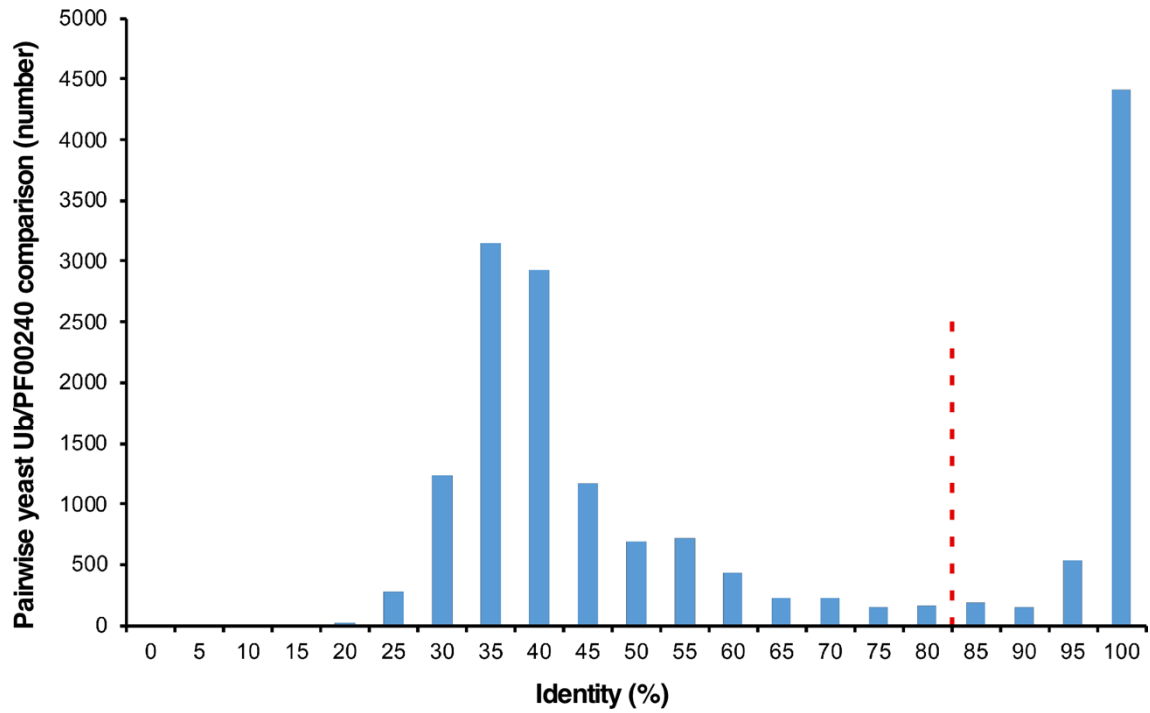

**Figure S1.** Number of pairwise yeast ubiquitin/PF00240 entry comparisons. The percentage shows the identity of the PF00240 architectural domain of all ubiquitin-containing proteins over at least 80% of their length with the yeast ubiquitin domain. Those proteins belonging to the PF00240 entry whose ubiquitin domain had less than 80% identity over at least 80% of its length with the yeast ubiquitin domain were discarded. In total, 5349 proteins were selected.

**A****EhUbi1**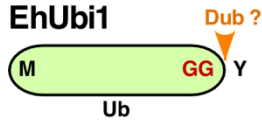**B****Ubi1**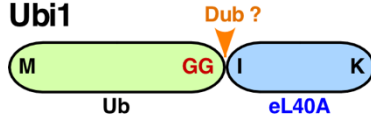**Ubi2**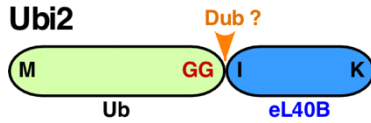**Ubi3**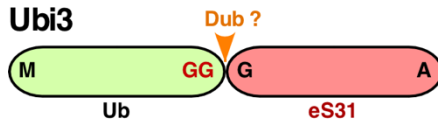**Ubi4**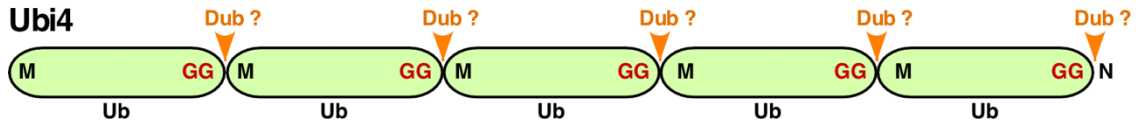

**Figure S2.** Schematic representation of the organization of different ubiquitin precursor proteins. Green blocks represent the ubiquitin sequence. The first amino acid and the diglycine motif are shown. Generation of free ubiquitin from the different precursors requires the action of specific deubiquitinases (Dub) and the question mark denotes that the specific enzymes in charge of the cleavages are still unknown. **(A)** EhUbi1 is a single ubiquitin precursor corresponding to a monoubiquitin gene from *Entamoeba histolytica*. Note that the ubiquitin moiety is synthesized as a precursor that contains a single extra amino acid, a tyrosine, that needs to be removed for ubiquitin activation. **(B)** Schematic representation of the four yeast ubiquitin precursors as a paradigm of the two classes of precursors found in most eukaryotes; Ubi1, Ubi2, and Ubi3 correspond to precursors containing a single copy of ubiquitin fused to the ribosomal protein eL40 (Ubi1 and Ubi2) and eS31 (Ubi3). Note that cleavage of the Ubi1 and Ubi2 precursors results in identical ubiquitin and eL40 proteins. Ubi4 corresponds to a polyubiquitin precursor protein, which consists of a polymer of five tandem ubiquitin monomers. Note that the last monomer has an extra asparagine following the diglycine sequence motif in the immature form.

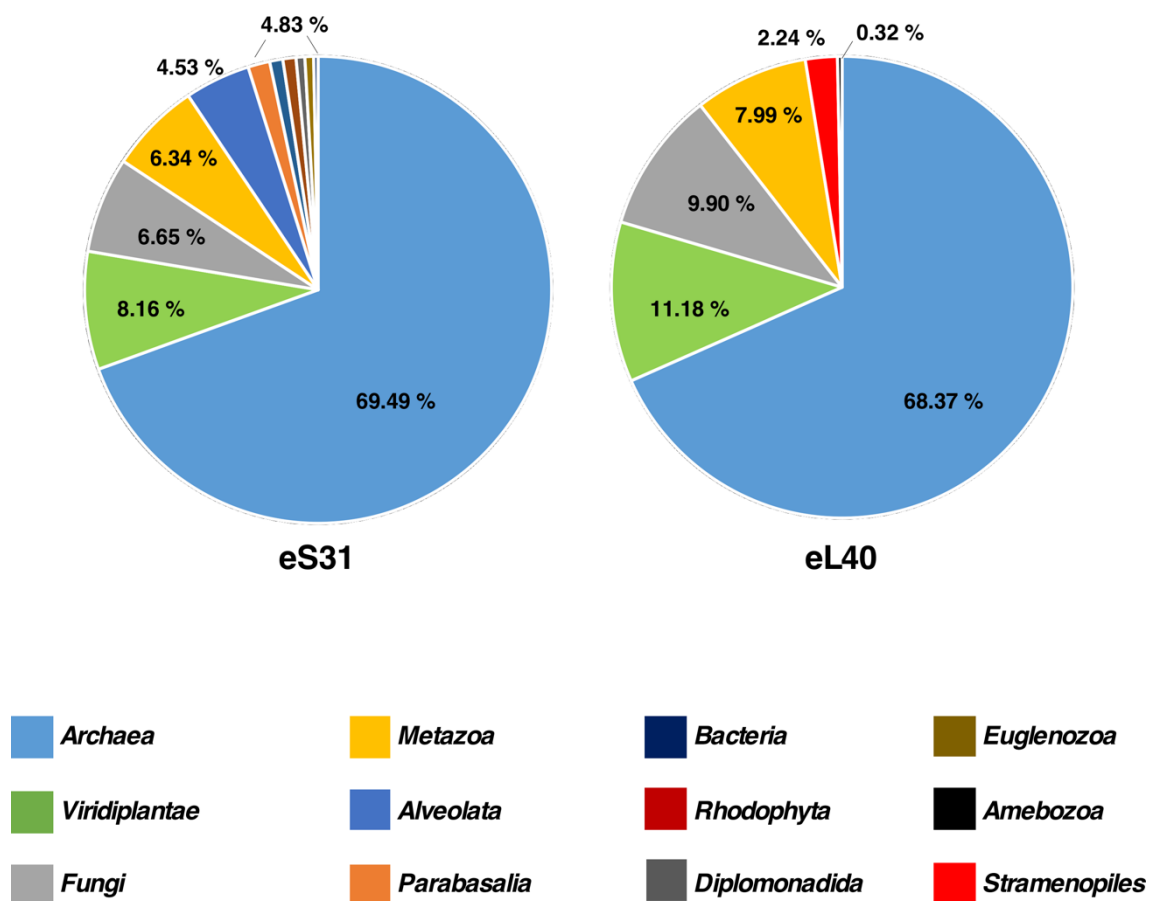

**Figure S3.** Taxonomic distribution of unfused ribosomal proteins eS31 and eL40. The PFAM database was searched for isolated eS31 and eL40 ribosomal proteins that are not fused to ubiquitin or other domains. Note that most proteins being retrieved by this criterion belong to the Archaea domain, but also reasonable representation percentages were found in plants, animals, and fungi.
